# Supplementary material for: Epidemiology of multimorbidity in conditions of extreme poverty: a population-based study of older adults in rural Burkina Faso
Source: PubMed Central journal article supplement — BMJ Glob Health. 2020 Mar 29;5(3):e002096. doi: 10.1136/bmjgh-2019-002096 (PMC7170422; doi:10.1136/bmjgh-2019-002096), 2020-03-29
Supplement: bmjgh-2019-002096supp001.pdf [file bmjgh-2019-002096supp001.pdf]

Appendix 1 Weighted demographic characteristics of participants included in analysis and participants excluded due to missing data

| parameter                                  | group                   | Complete data independent variables<br>(n=2604) | Missing data independent variables<br>(n=424) |
|--------------------------------------------|-------------------------|-------------------------------------------------|-----------------------------------------------|
| Female                                     |                         | 50.1                                            | 48.6                                          |
| age                                        | 40-49                   | 41.7                                            | 40.5                                          |
|                                            | 50-59                   | 37.7                                            | 28.3                                          |
|                                            | 60-69                   | 18                                              | 16.5                                          |
|                                            | 70-79                   | 10.2                                            | 10.7                                          |
|                                            | 80+                     | 2.5                                             | 3.9                                           |
| education level                            | No completed education  | 92.5                                            | 93.1                                          |
|                                            | Some education          | 7.5                                             | 6.9                                           |
| marital status                             | Widowed/divorced/single | 25                                              | 22.6                                          |
|                                            | Married/cohabiting      | 75                                              | 77.4                                          |
| wealth quintile (5 is the most<br>wealthy) | 1                       | 19.4                                            | 19                                            |
|                                            | 2                       | 19.7                                            | 17.9                                          |
|                                            | 3                       | 19.3                                            | 23.6                                          |
|                                            | 4                       | 20.8                                            | 17.4                                          |
|                                            | 5                       | 20.7                                            | 22.1                                          |

No significant differences tested using chi-square and tau-b

Appendix table 2 Bivariate associations between demographic characteristics and morbidity domain, number of conditions and morbidity category

| Variable                          | group                     | Morbidity domain |         |        | Number of conditions | More than two conditions |        | Multimorbidity category |                |
|-----------------------------------|---------------------------|------------------|---------|--------|----------------------|--------------------------|--------|-------------------------|----------------|
|                                   |                           | NCD (%)          | HIV (%) | MH (%) | Median (IQR)         | OR (95% CI)              | P      | Concordant (%)          | Discordant (%) |
| sex                               | female                    | 52.1             | 0.8     | 25.8   | 1 (0-2)              | Referent                 |        | 12.9                    | 15             |
|                                   | male                      | 45.4†            | 0.5     | 16.5*  | 1 (0-1)*             | 0.56 (0.48-0.66)         | <0.001 | 10.4*                   | 7.4*           |
| age                               | Correlation coefficient   | 0.140*           | -0.021  | 0.244* | 0.245*               | 1.05 (1.04-1.05)         | <0.001 | 0.091*                  | 0.205*         |
| education level completed         | Some education            | 65.8             | 1.6     | 22.1   | 1 (0-2)              | Referent                 |        | 24.1                    | 7              |
|                                   | No completed level        | 47.4             | 0.5†    | 9.3*   | 1 (0-1)*             | 0.63 (0.48-0.83)         | <0.001 | 10.7*                   | 11.5†          |
| marital status                    | married or cohabiting     | 46               | 0.6     | 17.5   | 1 (0-1)              | Referent                 |        | 10.7                    | 8.3            |
|                                   | widowed, divorced, single | 57.2*            | 0.6     | 32.1*  | 1 (0-2)*             | 2.19 (1.84-2.60)         | <0.001 | 14.4*                   | 19.6*          |
| wealth quintile (five is highest) | 5                         | 63.2             | 1.3     | 16.8   | 1 (0-2)              | Referent                 |        | 21.8                    | 11             |
|                                   | 4                         | 50.1             | 0.7     | 18.7   | 1 (0-1)              | 0.55 (0.44-0.70)         | <0.001 | 11                      | 10.2           |
|                                   | 3                         | 44.9             | 0.2     | 21.8   | 1 (0-1)              | 0.51 (0.40-0.66)         | <0.001 | 10                      | 10.1           |
|                                   | 2                         | 37.7             | 0.6     | 22     | 1 (0-1)              | 0.44 (0.34-0.56)         | <0.001 | 8.6                     | 9              |
|                                   | 1                         | 47.1             | 0.1     | 26.8‡  | 1 (0-1)‡             | 0.57 (0.45-0.72)         | <0.001 | 6.4‡                    | 15.3‡          |

\* p&lt;0.001

† p&lt;0.05

‡ p for trend &lt; 0.005



| Appendix 3 Sensitivity analysis only using objective measurements of disease |                              |                     |          |                     |        |                      |          |                     |        |                     |        |
|------------------------------------------------------------------------------|------------------------------|---------------------|----------|---------------------|--------|----------------------|----------|---------------------|--------|---------------------|--------|
| Variable                                                                     | group                        | Morbidity domain    |          |                     |        | Number of conditions |          | Morbidity category  |        |                     |        |
|                                                                              |                              | NCD                 |          | MH                  |        | EM<br>(95% CI)       | P        | Concordant (%)      |        | Discordant (%)      |        |
|                                                                              |                              | OR<br>(95% CI)      | P        | OR<br>(95% CI)      | P      |                      |          | OR<br>(95% CI)      | P      | OR<br>(95% CI)      | P      |
| sex                                                                          | female                       | Referent            | -        | Referent            | -      | 0.93<br>(0.69-0.84)  | -        | Referent            | -      | Referent            | -      |
|                                                                              | male                         | 0.8<br>(0.68-0.93)  | 0.005    | 0.68<br>(0.56-0.82) | <0.001 | 0.77<br>(0.69-0.84)  | <0.001   | 0.62<br>(0.49-0.79) | 0.001  | 0.57<br>(0.42-0.76) | <0.001 |
| age                                                                          |                              | 1.03<br>(1.02-1.04) | <0.001   | 1.04<br>(1.03-1.05) | <0.001 | 0.021*<br>0.002      | <0.001   | 1.04<br>(1.03-1.05) | <0.001 | 1.05<br>(1.04-1.06) | <0.001 |
|                                                                              | education level completed    | Some education      | Referent | Referent            | -      | 0.96<br>(0.83-1.08)  | -        | Referent            | -      | Referent            | -      |
|                                                                              | no completed level           | 0.48<br>(0.36-0.63) | <0.001   | 1.7<br>(1.08-2.65)  | 0.02   | 0.73<br>(0.69-0.77)  | 0.001    | 0.46<br>(0.32-0.66) | <0.001 | 0.91<br>(0.51-1.65) | 0.762  |
| marital status                                                               | married or cohabiting        | Referent            | -        | Referent            | -      | 0.8<br>(0.73-0.86)   | Referent | Referent            | -      | Referent            | -      |
|                                                                              | widowed, divorced, separated | 1.19<br>(0.98-1.44) | 0.076    | 1.2<br>(0.96-1.48)  | 0.106  | 0.9<br>(0.81-0.99)   | 0.027    | 1.19<br>(0.91-1.56) | 0.205  | 1.36<br>(0.92-1.99) | 0.121  |
| wealth quintile (five is highest)                                            | 5                            | Referent            |          | Referent            | -      | 1.02<br>(0.94-1.10)  | -        | Referent            | -      | Referent            | -      |
|                                                                              | 4                            | 0.68<br>(0.54-0.84) | 0.001    | 1.08<br>(0.81-1.44) | 0.604  | 0.82<br>(0.73-0.92)  | <0.001   | 0.48<br>(0.32-0.62) | <0.001 | 1.05<br>(0.70-1.60) | 0.814  |
|                                                                              | 3                            | 0.55<br>(0.44-0.69) | <0.001   | 1.31<br>(0.98-1.74) | 0.067  | 0.81<br>(0.72-0.91)  | <0.001   | 0.52<br>(0.38-0.73) | <0.001 | 0.92<br>(0.60-1.42) | 0.717  |
|                                                                              | 2                            | 0.41<br>(0.32-0.51) | <0.001   | 1.31<br>(0.99-1.74) | 0.061  | 0.74<br>(0.65-0.84)  | <0.001   | 0.45<br>(0.32-0.62) | <0.001 | 0.81<br>(0.52-1.26) | 0.353  |
|                                                                              | 1                            | 0.6<br>(0.48-0.75)‡ | <0.001   | 1.36<br>(1.03-1.80) | 0.028  | 0.83<br>(0.73-0.92)  | <0.001   | 0.45<br>(0.32-0.62) | <0.001 | 1.36<br>(0.92-1.99) | 0.121  |

\*Beta values with standard errors

Appendix table 4 Multivariable associations between demographic characteristics and multimorbidity (MM) ( $\geq 2$  conditions) in the domains of non-communicable diseases (NCDs), mental health (MH) or both

| Variable                          | group                     | Morbidity domain     |        |                      |        |                     |        |
|-----------------------------------|---------------------------|----------------------|--------|----------------------|--------|---------------------|--------|
|                                   |                           | MM NCD               |        | MM MH                |        | MM NCD + MH         |        |
|                                   |                           | OR<br>(95% CI)       | P      | OR<br>(95% CI)       | P      | OR<br>(95% CI)      | P      |
| sex                               | female                    | Referent             | -      | Referent             | -      | Referent            | -      |
|                                   | male                      | 0.54<br>(0.43-0.69)  | <0.001 | 0.92<br>(0.66-1.30)  | 0.644  | 0.53<br>(0.41-0.69) | <0.001 |
| age                               |                           | 1.03<br>(1.02-1.04)  | <0.001 | 1.06<br>(1.04-1.07)  | <0.001 | 1.05<br>(1.04-1.06) | <0.001 |
| education level completed         | Some education            | Referent             | -      | Referent             | -      | Referent            | -      |
|                                   | no completed level        | 0.38<br>(0.28-0.53)  | <0.001 | 6.19<br>(1.26-30.48) | 0.025  | 1.23<br>(0.70-2.15) | 0.467  |
| marital status                    | married or cohabiting     | Referent             | -      | Referent             | -      | Referent            | -      |
|                                   | widowed, divorced, single | 1.09<br>(0.83-1.43)  | 0.553  | 1.32<br>(0.91-1.92)  | 0.147  | 1.25<br>(0.95-1.64) | 0.11   |
| wealth quintile (five is highest) | 5                         | Referent             |        | Referent             | -      | Referent            | -      |
|                                   | 4                         | 0.45<br>(0.33-0.60)  | <0.001 | 1.03<br>(0.62-1.71)  | 0.924  | 0.96<br>(0.67-1.38) | 0.578  |
|                                   | 3                         | 0.37<br>(0.27-0.51)  | <0.001 | 1.16<br>(0.70-1.93)  | 0.562  | 0.97<br>(0.67-1.40) | 0.868  |
|                                   | 2                         | 0.23<br>(0.16-0.33)  | <0.001 | 1.17<br>(0.71-1.93)  | 0.543  | 0.80<br>(0.55-1.16) | 0.242  |
|                                   | 1                         | 0.22<br>(0.16-0.31)‡ | <0.001 | 1.25<br>(0.78-2.01)  | 0.359  | 1.18<br>(0.84-1.67) | 0.334  |

Appendix table 5 Multivariable analyses of concordant and discordant multimorbidity and frailty, disability, quality of life and measurements of physical performances

| Variable                    | Group                     | Frailty or unable   |        | WHO DAS                |        | Quality of life        |        | Time to chair rise     |        | Walk speed          |        | Hand grip strength     |        |
|-----------------------------|---------------------------|---------------------|--------|------------------------|--------|------------------------|--------|------------------------|--------|---------------------|--------|------------------------|--------|
|                             |                           | OR<br>(95% CI)      | P      | EM<br>(95% CI)         | P      | EM<br>(95% CI)         | P      | EM<br>(95% CI)         | P      | EM<br>(95% CI)      | P      | EM<br>(95% CI)         | P      |
| Sex                         | Female                    | Referent            | -      | 15.12<br>(13.42-17.03) | -      | 53.11<br>(53.89-54.33) | -      | 15.28<br>(14.87-15.70) | -      | 0.91<br>(0.89-0.93) | -      | 32.45<br>(31.76-33.15) | -      |
|                             | Male                      | 1.07<br>(0.83-1.38) | 0.588  | 11.89<br>(10.48-13.49) | <0.001 | 55.06<br>(53.79-56.34) | <0.001 | 13.5<br>(13.12-13.89)  | <0.001 | 1.03<br>(1.01-1.05) | <0.001 | 44.77<br>(44.05-45.50) | <0.001 |
| Age                         |                           | 1.08<br>(1.07-1.09) | <0.001 | 0.040*<br>0.002        | <0.001 | -0.321*<br>0.025       | <0.001 | 0.009*<br>0.001        | <0.001 | -0.007*<br>0.001    | <0.001 | -0.417*<br>0.014       | <0.001 |
| Educational level completed | Some education            | Referent            | -      | 11.21<br>(9.14-13.74)  | -      | 54.8<br>(52.84-56.76)  | -      | 13.75<br>(13.16-14.36) | -      | 1.01<br>(0.97-1.04) | -      | 39.77<br>(38.65-40.88) | -      |
|                             | No education              | 0.9<br>(0.56-1.46)  | 0.679  | 16.03<br>(14.91-17.24) | 0.001  | 53.37<br>(52.54-54.19) | 0.158  | 15<br>(14.72-15.29)    | <0.001 | 0.93<br>(0.92-0.95) | <0.001 | 37.46<br>(36.98-37.93) | <0.001 |
| Marital status              | Married or cohabiting     |                     | -      | 11.49<br>(11.14-14.02) | -      | 54.8<br>(53.63-55.97)  | -      | 14.1<br>(13.74-14.47)  | -      | 0.98<br>(0.96-1.01) | -      | 38.26<br>(37.43-39.08) | -      |
|                             | Widowed, divorced, single | 1.19<br>(0.90-1.56) | 0.218  | 14.39<br>(12.55-16.50) | 0.021  | 53.37<br>(51.93-54.82) | 0.039  | 14.62<br>(14.15-15.11) | 0.018  | 0.96<br>(0.93-0.98) | 0.016  | 38.97<br>(38.30-39.63) | 0.071  |
| Wealth (quintiles):         | 5                         | Referent            | -      | 13.93<br>(12.25-15.83) | -      | 58.86<br>(57.53-60.18) | -      | 14.72<br>(14.29-15.16) | -      | 0.97<br>(0.95-0.99) | -      | 40.74<br>(39.98-41.49) | -      |
|                             | 4                         | 0.8<br>(0.56-1.13)  | 0.028  | 12.88<br>(11.10-14.95) | 0.31   | 56.36<br>(54.85-57.87) | 0.002  | 14.19<br>(13.72-14.68) | 0.04   | 1.01<br>(0.98-1.03) | 0.005  | 39.09<br>(38.22-39.95) | <0.001 |
|                             | 3                         | 0.57<br>(0.39-0.83) | 0.004  | 13.56<br>(11.63-15.81) | 0.731  | 53.64<br>(52.07-55.21) | <0.001 | 14.08<br>(13.60-14.58) | 0.013  | 0.97<br>(0.94-1.00) | 0.805  | 38.54<br>(37.65-39.44) | <0.001 |
|                             | 2                         | 0.94<br>(0.67-1.33) | 0.781  | 13.45<br>(11.56-15.66) | 0.658  | 53.31<br>(51.75-54.87) | <0.001 | 14.47<br>(13.98-14.97) | 0.335  | 0.97<br>(0.94-0.99) | 0.87   | 37.99<br>(37.10-38.88) | <0.001 |
|                             | 1                         | 1.12<br>(0.80-1.55) | 0.509  | 13.24<br>(11.40-15.36) | 0.513  | 48.26<br>(46.71-49.81) | <0.001 | 14.35<br>(13.86-14.86) | 0.171  | 0.94<br>(0.91-0.96) | 0.026  | 36.71<br>(35.82-37.60) | <0.001 |
| Multimorbidity category     | No multimorbidity         | Referent            | -      | 9.09<br>(8.13-10.17)   | -      | 57.37<br>(56.30-58.45) | -      | 14.12<br>(13.79-14.46) | -      | 0.99<br>(0.98-1.01) | -      | 38.83<br>(38.22-39.45) | -      |
|                             | Concordant                | 1.46<br>(1.06-2.01) | 0.019  | 15.16<br>(13.00-17.69) | <0.001 | 53.48<br>(51.82-55.14) | <0.001 | 14.57<br>(14.04-15.12) | 0.082  | 0.96<br>(0.93-0.99) | 0.023  | 38.94<br>(38.00-39.89) | 0.109  |
|                             | Discordant                | 2.53<br>(1.91-3.34) | <0.001 | 17.48<br>(14.98-20.40) | <0.001 | 51.4<br>(49.65-53.15)  | <0.001 | 14.39<br>(13.82-14.98) | 0.324  | 0.95<br>(0.92-0.99) | 0.006  | 38.06<br>(37.05-39.07) | 0.814  |

\*Beta values with standard errors

Appendix 6 Multivariable associations between multimorbidity category and frailty, disability, quality of life and measurements of physical performances after adjusting for number of conditions

| Variable                    | Group                     | Outcome             |        |                        |        |                        |        |                        |        |                     |        |                        |        |
|-----------------------------|---------------------------|---------------------|--------|------------------------|--------|------------------------|--------|------------------------|--------|---------------------|--------|------------------------|--------|
|                             |                           | Frail or unable     |        | Who DAS                |        | Quality of Life        |        | Time to chair rise     |        | Walk speed          |        | Grip strength          |        |
|                             |                           | OR<br>(95% CI)      | P      | EM<br>(95% CI)         | P      | EM<br>(95% CI)         | P      | EM<br>(95% CI)         | P      | EM<br>(95% CI)      | P      | EM<br>(95% CI)         | P      |
| Sex                         | Female                    | Referent            | -      | 16.18<br>(9.96-26.30)  | -      | 48.35<br>(42.25-54.45) | -      | 14.42<br>(12.50-16.64) | -      | 0.83<br>(0.72-0.93) | -      | 29.11<br>(25.86-32.36) | -      |
|                             | Male                      | 0.87<br>(0.55-1.37) | 0.557  | 14.57<br>(8.89-23.88)  | 0.645  | 47.52<br>(41.33-53.71) | 0.543  | 12.37<br>(10.71-14.29) | <0.001 | 0.93<br>(0.82-1.04) | <0.001 | 41.22<br>(37.90-44.54) | <0.001 |
| Age                         |                           | 1.09<br>(1.07-1.11) | <0.001 | 0.031*<br>0.004        | <0.001 | -0.239*<br>0.054       | <0.001 | 0.009*<br>0.001        | <0.001 | -0.009*<br>0.001    | <0.001 | -0.395*<br>0.028       | <0.001 |
|                             |                           |                     |        |                        |        |                        |        |                        |        |                     |        |                        |        |
| Educational level completed | Some education            | Referent            | -      | 13.75<br>(8.00-23.64)  | -      | 48.29<br>(41.48-55.10) | -      | 12.9<br>(11.03-15.08)  | -      | 0.93<br>(0.81-1.05) | -      | 35.87<br>(32.29-39.45) | -      |
|                             | No education              | 0.68<br>(0.32-1.44) | 0.515  | 17.15<br>(10.74-27.36) | 0.001  | 47.58<br>(41.70-53.46) | 0.743  | 13.84<br>(12.06-14.88) | 0.104  | 0.82<br>(0.72-0.93) | 0.004  | 34.46<br>(31.29-37.64) | 0.193  |
| Marital status              | Married or cohabiting     | Referent            | -      | 14.4<br>(8.83-23.47)   | -      | 48.29<br>(42.17-54.41) | -      | 13.01<br>(11.26-15.03) | -      | 0.89<br>(0.79-1.00) | -      | 35.27<br>(32.00-38.55) | -      |
|                             | Widowed, divorced, single | 1.08<br>(0.68-1.72) | 0.737  | 16.4<br>(10.01-26.79)  | 0.188  | 47.59<br>(41.36-53.81) | 0.638  | 13.72<br>(11.88-15.84) | 0.091  | 0.86<br>(0.75-0.97) | 0.142  | 35.06<br>(31.74-38.38) | 0.773  |
| Wealth (quintiles):         | 5                         | Referent            | -      | 14.83<br>(9.70-25.82)  | -      | 55.31<br>(49.16-61.46) | -      | 13.76<br>(11.91-15.89) | -      | 0.87<br>(0.76-0.98) | -      | 37.4<br>(34.13-40.67)  | -      |
|                             | 4                         | 0.62<br>(0.33-1.17) | 0.138  | 14.55<br>(8.75-24.17)  | 0.495  | 51.93<br>(45.54-58.33) | 0.059  | 13.23<br>(11.41-15.35) | 0.292  | 0.91<br>(0.80-1.02) | 0.257  | 36<br>(32.57-39.43)    | 0.125  |
|                             | 3                         | 0.62                | 0.117  | 14.99                  | 0.67   | 47.69                  | <0.001 | 13.01                  | 0.147  | 0.86                | 0.694  | 35.07                  | 0.014  |

|                              |             |                     |        |                        |        |                        |        |                        |       |                     |       |                        |       |
|------------------------------|-------------|---------------------|--------|------------------------|--------|------------------------|--------|------------------------|-------|---------------------|-------|------------------------|-------|
|                              |             | (0.33-1.17)         |        | (9.03-24.87)           |        | (41.14-54.23)          |        | (11.20-15.13)          |       | (0.75-0.98)         |       | (31.60-38.53)          |       |
|                              | 2           | 1.04<br>(0.57-1.91) | 0.889  | 15.83<br>(9.42-26.60)  | 0.997  | 47.89<br>(41.24-54.53) | <0.001 | 13.66<br>(11.73-15.91) | 0.862 | 0.87<br>(0.75-0.98) | 0.806 | 34.62<br>(31.10-38.13) | 0.005 |
|                              | 1           | 1.2<br>(0.68-2.12)  | 0.53   | 15.64<br>(9.35-26.17)  | 0.926  | 36.86<br>(30.26-43.47) | <0.001 | 13.13<br>(11.27-15.30) | 0.244 | 0.87<br>(0.75-0.98) | 0.803 | 32.75<br>(29.24-36.26) | 0.001 |
| HIV                          | No          | Referent            | -      | 22.66<br>(19.18-26.77) | -      | 48.47<br>(46.15-50.78) |        | 15.15<br>(14.46-15.88) | -     | 0.92<br>(0.88-0.96) | -     | 35.96<br>(34.80-37.12) | -     |
|                              | Yes         | 0.61<br>(0.07-5.06) | 0.334  | 10.41<br>(4.10-26.41)  | 0.101  | 47.4<br>(35.82-58.99)  | 0.858  | 11.78<br>(8.95-11.50)  | 0.073 | 0.83<br>(0.62-1.04) | 0.396 | 34.37<br>(28.12-40.62) | 0.581 |
| Number of conditions         | -           | 1.65<br>(1.28-2.13) | <0.001 | 0.181*<br>0.056        | <0.001 | -0.239*<br>0.860       | <0.001 | 0.013*<br>0.001        | 0.509 | -0.023*<br>0.015    | 0.117 | -0.280*<br>0.443       | 0.527 |
| Multimorbidity (MM) category | MM NCD      | Referent            | -      | 12.19<br>(7.49-19.84)  | -      | 51.56<br>(45.47-57.65) | -      | 13.43<br>(11.64-15.50) | -     | 0.9<br>(0.79-1.01)  | -     | 36.69<br>(33.43-39.94) | -     |
|                              | MM MH       | 2.27<br>(1.18-2.13) | 0.002  | 19.38<br>(11.53-32.59) | <0.001 | 42.56<br>(45.84-49.28) | <0.001 | 13.48<br>(11.57-15.70) | 0.929 | 0.83<br>(0.71-0.95) | 0.039 | 33.61<br>(30.07-37.14) | 0.003 |
|                              | MM NCD + MH | 1.68<br>(1.05-2.69) | <0.001 | 15.34<br>(9.35-25.15)  | 0.017  | 49.69<br>(43.43-55.94) | 0.183  | 13.16<br>(11.37-15.25) | 0.493 | 0.9<br>(0.78-1.05)  | 0.801 | 35.21<br>(31.86-38.56) | 0.037 |

\*Beta values with standard errors
